# Supplementary material
Source: HighWire-hosted journal article supplement (https://bmjopen.bmj.com/content/12/3/e058406)
Supplement: inline-supplementary-material-1 [file inline-supplementary-material-1.pdf]

## Quickfire Survey

| Have you been involved in research or clinical studies using:                                                                      | Yes | No |
|------------------------------------------------------------------------------------------------------------------------------------|-----|----|
| Interviews<br>(one-to-one interviews, where a researcher asks you questions)                                                       |     |    |
| Focus groups<br>(group-based workshops, where a researcher asks questions and facilitates group-discussion)                        |     |    |
| Visual methods<br>(the use of visual documents such as drawings, painting, photographs to help express your thoughts and feelings) |     |    |
| Questionnaires<br>(a document with a series of questions)                                                                          |     |    |
| Diaries or journals<br>(regular logging of information such as your listening experience)                                          |     |    |
| Observations<br>(where a researcher observes your behaviours)                                                                      |     |    |

  

| Please rank these techniques (1=most preferred; 6=least preferred) | Rank (1-6) |
|--------------------------------------------------------------------|------------|
| Interviews                                                         |            |
| Focus groups                                                       |            |
| Visual methods                                                     |            |
| Questionnaires                                                     |            |
| Diaries or journals                                                |            |
| Observations                                                       |            |

  

| Please rank how you would like interviews, focus groups, and visual methods to be completed (1=most preferred, 2=least preferred) | Rank (1-2) |
|-----------------------------------------------------------------------------------------------------------------------------------|------------|
| Face-to-face, in-person                                                                                                           |            |
| Videotelephone (e.g. via Zoom, Skype, or Teams)                                                                                   |            |

  

| Please rank how you would like questionnaires are completed (1=most preferred, 3=least preferred) | Rank (1-3) |
|---------------------------------------------------------------------------------------------------|------------|
| On paper                                                                                          |            |
| Digitally, on a computer                                                                          |            |
| Digitally, on a smart phone or tablet                                                             |            |

  

| Would you like the researcher present when you complete a questionnaire? | Yes | No |
|--------------------------------------------------------------------------|-----|----|
|                                                                          |     |    |

  

| Please rank how you would like diaries or journals to be completed (1=most preferred, 3=least preferred) | Rank (1-3) |
|----------------------------------------------------------------------------------------------------------|------------|
| On paper                                                                                                 |            |
| Digitally, on a computer                                                                                 |            |
| Digitally, on a smart phone or tablet                                                                    |            |

  

| Have you completed questionnaires that use: | Yes | No |
|---------------------------------------------|-----|----|
| Numerical rating scale                      |     |    |
| Visual analogue scale                       |     |    |
| Verbal rating scale                         |     |    |
| Likert scale                                |     |    |
| Choice scale                                |     |    |

  

| Please rank these types of questions (1=most preferred, 5=least preferred) | Rank (1-5) |
|----------------------------------------------------------------------------|------------|
| Numerical rating                                                           |            |
| Visual analogue scale                                                      |            |
| Verbal rating scale                                                        |            |
| Likert scale                                                               |            |
| Choice scale                                                               |            |
